# Supplementary material for: Facile preparation of semimetallic MoP2 as a novel visible light driven photocatalyst with high photocatalytic activity
Source: Royal Society of Chemistry journal article supplement (doi:10.1039/c5ta00870k), 2015-01-01
Supplement: c5ta00870k1.pdf [file c5ta00870k1.pdf]

Supporting information for

**Facile Preparation of Semimetallic MoP<sub>2</sub> as a Novel Visible Light  
driven Photocatalyst with high photocatalytic activity**

*Tianli Wu, Shijian Chen\*, Dingke Zhang, Junke Hou*

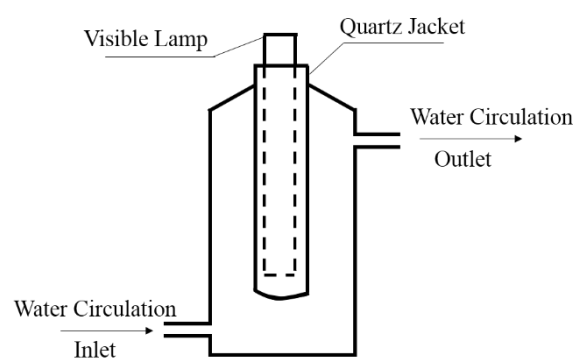

Figure S1. Schematic diagram of the photocatalysis reactor.

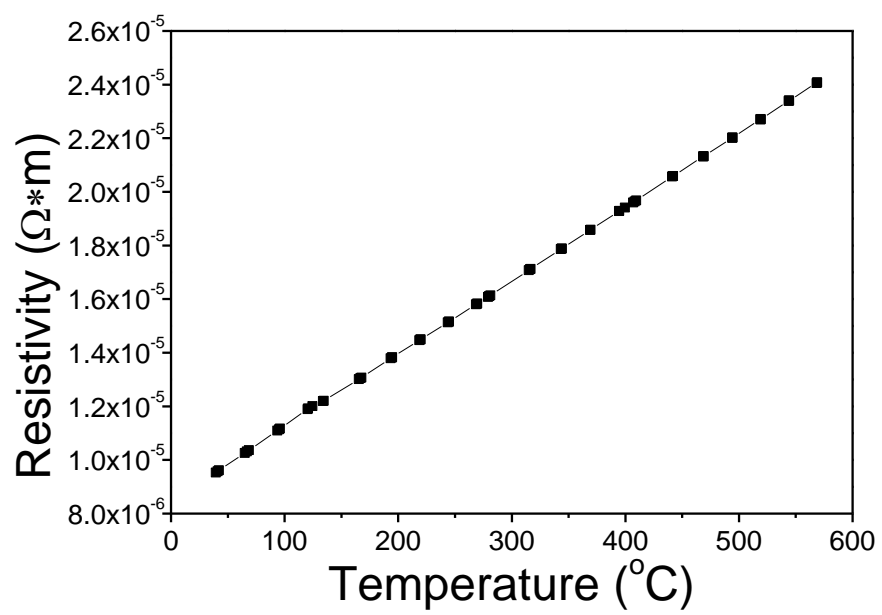

Figure S2. Resistivity change with temperature.

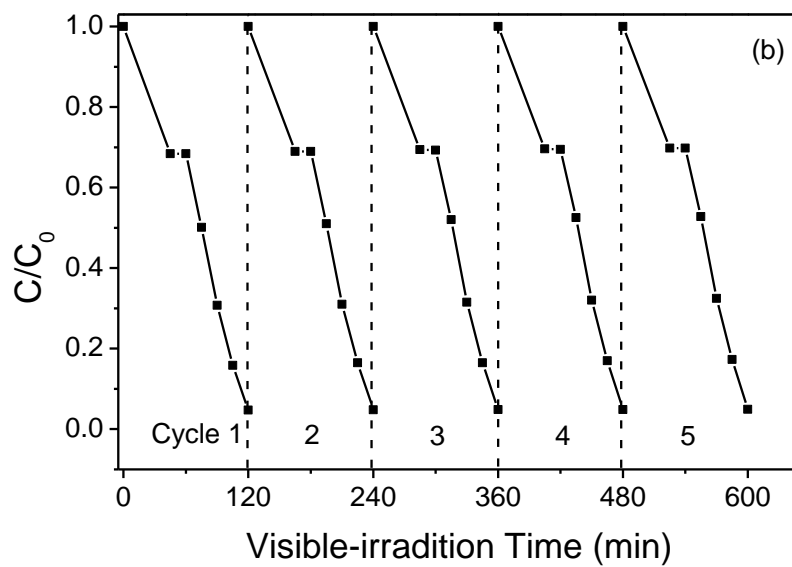

Figure S3. Cycling runs of methyl orange decolourisation using pure MoP<sub>2</sub>.

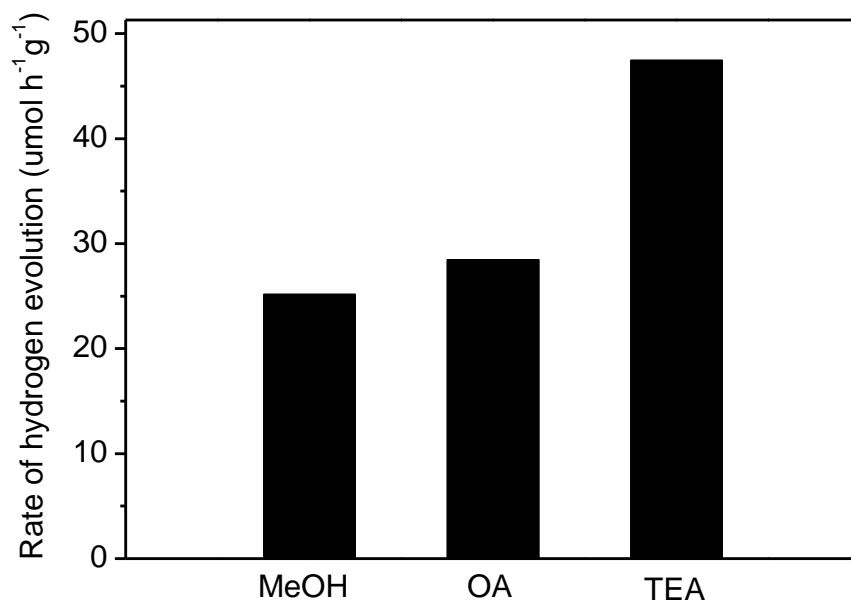

Figure S4. H<sub>2</sub> production from water containing various electron donors under visible light ( $\lambda > 400\text{nm}$ ) by ball milling and 2 wt% Pt-loaded MoP<sub>2</sub> catalyst. MeOH, methanol (20 vol.%); OA, oxalic acid (0.02 M); TEA, triethanolamine (20 vol.%)
